# Supplementary material for: Facile fabrication of polyurethane/epoxy IPNs filled graphene aerogel with improved damping, thermal and mechanical properties
Source: Royal Society of Chemistry journal article supplement (doi:10.1039/c8ra04718a), 2018-01-01
Supplement: c8ra04718a1.pdf [file c8ra04718a1.pdf]

## Supporting Information

### **Facile fabrication of polyurethane/epoxy IPNs filled graphene aerogel with improved damping, thermal and mechanical properties**

Chunmei Zhang<sup>a,1</sup>, Yujie Chen<sup>a,1</sup>, Hua Li<sup>a,b,\*</sup> and Hezhou Liu<sup>a,b</sup>

<sup>a</sup>State Key Laboratory of Metal Matrix Composites, School of Materials Science and Engineering, Shanghai Jiao Tong University, Dongchuan Road No. 800, Shanghai 200240, China.

<sup>b</sup>Collaborative Innovation Center for Advanced Ship and deep-Sea Exploration, Shanghai Jiao Tong University.

\*Corresponding author: Hua Li (email: [lih@sjtu.edu.cn](mailto:lih@sjtu.edu.cn))

<sup>1</sup>These authors contributed equally to this work.

**Figure S1** The SEM images of the fracture surface of (a) epoxy resin, (b) PU/EP-20, (c) PU/EP-40, (d) PU/EP-50; (e), (f) and (g) different magnifications of the morphology of composite PEGA-40; and (h) the morphology of PU/EP-40
